# Supplementary material for: Barriers and facilitators for providing self-care advice in community pharmacies: a qualitative study
Source: Springer Nature journal article supplement (doi:10.1007/s11096-023-01571-3), 2023-04-08
Supplement: MOESM2 [file 25221402]

## Online resource 2: Topic List Pharmacy Assistants

Barriers and Facilitators for Evidence-Based Self-Care Counselling in Community Pharmacy

International Journal of Clinical Pharmacy

Rian Lelie- van der Zande, Ellen Koster, Martina Teichert, Marcel Bouvy

Department of Pharmacoepidemiology and Clinical Pharmacology, Utrecht Institute for Pharmaceutical Sciences, Utrecht University, Utrecht, the Netherlands

a.c.a.lelie-vanderzande@uu.nl

| Questions                                                                                                                                                                                                                                                                                                                 | Prompts                                                                                                                                                                                                                                                                                         |
|---------------------------------------------------------------------------------------------------------------------------------------------------------------------------------------------------------------------------------------------------------------------------------------------------------------------------|-------------------------------------------------------------------------------------------------------------------------------------------------------------------------------------------------------------------------------------------------------------------------------------------------|
| <b>What do you understand by the term 'self-care'?</b>                                                                                                                                                                                                                                                                    |                                                                                                                                                                                                                                                                                                 |
| <b>What do you consider to be the professional role of the pharmacy assistant in self-care according to the self-care guidelines?</b><br><i>(Professional role, Environmental context, Knowledge, Skills)</i>                                                                                                             | Professional role of the pharmacist in self-care advice according to the self-care guidelines<br>Attitude of assistant towards self-care advice from druggists.<br>Difference between self-care advice from pharmacy and from druggist<br>Referral to GPs according to the self-care guidelines |
| <b>What do you consider to be the importance of self-care advice according to the self-care guidelines compared to pharmaceutical care with regard to prescription medicines (e.g. dispensing process, medication review)?</b><br><i>(Professional role, Environmental context, Social influences, Goals, Intentions)</i> | Who delivers self-care advice according to the self-care guidelines<br>at the counter<br>Priority of self-care advice according to the self-care guidelines                                                                                                                                     |
| <b>How is the self-care process organised in pharmacy?</b><br><i>(Professional role, Intentions, Knowledge, Skills, Memory, attention and decision processes, Behavioural regulation)</i>                                                                                                                                 | Task allocation                                                                                                                                                                                                                                                                                 |
| <b>What kind of self-care requests do consumers and patients make in your pharmacy (e.g. product-, condition- or symptom-based)?</b><br><i>(Beliefs about capabilities, Skills, Knowledge, Beliefs about consequences, Intentions, Social influences, Professional role)</i>                                              | Team agreement on how to handle these questions<br>Types of consumers visiting pharmacy for self-care advice<br>Self-confidence                                                                                                                                                                 |
| <b>What barriers do you experience when advising on self-care according to the self-care guidelines?</b><br><i>(Knowledge, Skills, Beliefs about capabilities, Intentions, Beliefs about consequences, Environmental context and resources)</i>                                                                           | Hurried customers<br>Privacy sensitive minor ailment<br>Other customers listening in<br>Intense work pressure<br>Staff shortages<br>Training                                                                                                                                                    |

|                                                                                                                                                                                                                                                                                                                                                      |                                                                                                                                                                                                                                                                                                                                                       |
|------------------------------------------------------------------------------------------------------------------------------------------------------------------------------------------------------------------------------------------------------------------------------------------------------------------------------------------------------|-------------------------------------------------------------------------------------------------------------------------------------------------------------------------------------------------------------------------------------------------------------------------------------------------------------------------------------------------------|
|                                                                                                                                                                                                                                                                                                                                                      | <p>Dealing with barriers</p> <p>Factors that encourage attention to self-care</p> <p>Use and review of supporting materials</p>                                                                                                                                                                                                                       |
| <p><b>Self-care guidelines include lifestyle advice. What is your opinion on that?</b></p> <p><i>(Knowledge, Skills, Professional role, Beliefs about capabilities, Beliefs about consequences, Intentions, Goals, Memory, attention and decision processes, Social influences, Environmental context and resources, Behavioural regulation)</i></p> | <p>Dealing with lifestyle advice for minor ailments</p> <p>Team agreements</p>                                                                                                                                                                                                                                                                        |
| <p><b>What skills do you need to provide self-care advice according to the self-care guidelines?</b></p> <p><i>(Knowledge, Skills, Professional role, Beliefs about capabilities, Goals, Memory, attention and decision processes, Behavioural regulation)</i></p>                                                                                   | <p>Conversation skills</p> <p>Decision making</p> <p>Asking follow-up questions</p><br><p>Ready knowledge, plus ready knowledge of colleagues</p> <p>Basis of ready knowledge</p> <p>Training during education</p> <p>Updating of knowledge</p> <p>Training of self-care knowledge and skills</p> <p>Assessment of self-care knowledge and skills</p> |
| <p><b>What do you do when experiencing problems providing self-care advice according to the self-care guidelines?</b></p> <p><i>(Social influences, Professional role, Skills)</i></p>                                                                                                                                                               | <p>Consultation of colleague, when?</p> <p>Consultation of the pharmacist, when?</p> <p>Agreements within the team about when to consult the pharmacist</p>                                                                                                                                                                                           |
| <p><b>How do you feel after providing a customer with self-care advice according to the self-care guidelines?</b></p> <p><i>(Optimism, Emotion, Beliefs about consequences)</i></p>                                                                                                                                                                  | <p>Explanation</p>                                                                                                                                                                                                                                                                                                                                    |
| <p><b>Are there any self-care topics that we missed and that you would like to discuss?</b></p>                                                                                                                                                                                                                                                      |                                                                                                                                                                                                                                                                                                                                                       |
